# Supplementary material
Source: PubMed Central journal article supplement (PMC4067091)
Supplement: NIHMS574471-supplement-Macrophage_inflammatory_markers.pdf [file NIHMS574471-supplement-Macrophage_inflammatory_markers.pdf]

**Supplemental Table I. Association between individual inflammatory macrophage markers and measures of subclinical carotid artery disease, by HIV and HCV status, Women's Interagency HIV Study.**

|                         | N  | Any carotid artery lesion |                    |             | Distensibility ( $10^{-6} \times N^{-1} \times m^2$ ) |                     |             | cIMT (mm)    |                     |             |
|-------------------------|----|---------------------------|--------------------|-------------|-------------------------------------------------------|---------------------|-------------|--------------|---------------------|-------------|
|                         |    | Odds ratio                | 95% CI             | P           | $\beta$                                               | 95% CI              | P           | $\beta$      | 95% CI              | P           |
| <u>Gal-3BP (per SD)</u> |    |                           |                    |             |                                                       |                     |             |              |                     |             |
| HIV-/HCV-               | 65 | 1.60                      | 0.66, 3.87         | 0.30        | -1.81                                                 | -3.83, 0.21         | 0.08        | -0.001       | -0.02, 0.02         | 0.90        |
| HIV-/HCV+               | 63 | 2.07                      | 0.89, 4.81         | 0.09        | -0.43                                                 | -2.12, 1.25         | 0.62        | -0.03        | -0.07, 0.01         | 0.12        |
| HIV+/HCV-               | 64 | 1.48                      | 0.58, 3.79         | 0.41        | -2.49                                                 | -5.01, 0.03         | 0.05        | -0.02        | -0.07, 0.02         | 0.28        |
| HIV+/HCV+               | 64 | 1.72                      | 0.80, 3.70         | 0.17        | -1.14                                                 | -2.59, 0.32         | 0.13        | 0.0002       | -0.03, 0.03         | 0.99        |
| <u>sCD163 (per SD)</u>  |    |                           |                    |             |                                                       |                     |             |              |                     |             |
| HIV-/HCV-               | 65 | 0.74                      | 0.20, 2.75         | 0.65        | 0.03                                                  | -2.66, 2.71         | 0.98        | -0.002       | -0.03, 0.03         | 0.90        |
| HIV-/HCV+               | 63 | 1.29                      | 0.45, 3.71         | 0.64        | -1.17                                                 | -3.32, 0.99         | 0.29        | -0.034       | -0.08, 0.02         | 0.17        |
| HIV+/HCV-               | 64 | <b>4.12</b>               | <b>1.11, 15.21</b> | <b>0.03</b> | -0.23                                                 | -2.55, 2.08         | 0.84        | <b>-0.05</b> | <b>-0.09, -0.02</b> | <b>0.01</b> |
| HIV+/HCV+               | 64 | <b>2.68</b>               | <b>1.10, 6.54</b>  | <b>0.03</b> | 0.15                                                  | -1.62, 1.92         | 0.87        | -0.004       | -0.04, 0.03         | 0.78        |
| <u>sCD14 (per SD)</u>   |    |                           |                    |             |                                                       |                     |             |              |                     |             |
| HIV-/HCV-               | 65 | 1.89                      | 0.48, 7.49         | 0.36        | 0.57                                                  | -2.63, 3.77         | 0.73        | -0.004       | -0.04, 0.03         | 0.81        |
| HIV-/HCV+               | 63 | 0.84                      | 0.23, 3.04         | 0.79        | -1.07                                                 | -3.57, 1.43         | 0.40        | 0.01         | -0.05, 0.07         | 0.74        |
| HIV+/HCV-               | 64 | 1.37                      | 0.61, 3.07         | 0.44        | <b>-2.38</b>                                          | <b>-4.45, -0.31</b> | <b>0.02</b> | -0.02        | -0.06, 0.01         | 0.23        |
| HIV+/HCV+               | 64 | 1.78                      | 0.97, 3.29         | 0.06        | -0.96                                                 | -2.22, 0.30         | 0.14        | 0.02         | -0.007, 0.04        | 0.19        |

cIMT = right distal common carotid artery intima-medial thickness, CI = confidence interval, HCV = hepatitis C virus, HIV = human immunodeficiency virus, m = meters, mm = millimeters, N = Newtons, SD = standard deviation.

All analyses adjusted for age, race/ethnicity, smoking status, body mass index, high-sensitivity C-reactive protein, and HIV and HCV infection. Bold indicates significant at  $p < 0.05$ .

**Supplemental Table II. Association between inflammatory macrophage markers and right distal common carotid artery intima-media thickness, Women's Interagency HIV Study.**

|                                                                                | <b>cIMT (mm)</b> |                      |             |
|--------------------------------------------------------------------------------|------------------|----------------------|-------------|
|                                                                                | <b>β</b>         | <b>95% CI</b>        | <b>P</b>    |
| <b>Inflammatory macrophage score, per each elevated marker (range: 0-3)</b>    |                  |                      |             |
| <u>Among entire study population (N=256)</u>                                   |                  |                      |             |
| Modeled as continuous                                                          | -0.009           | -0.03, 0.01          | 0.34        |
| Modeled as categorical                                                         |                  |                      |             |
| 0 (reference group)                                                            | 0.00             |                      |             |
| 1                                                                              | -0.03            | -0.07, 0.01          | 0.11        |
| 2                                                                              | -0.03            | -0.07, 0.02          | 0.21        |
| 3                                                                              | -0.03            | -0.09, 0.02          | 0.25        |
| <u>Stratified analyses</u>                                                     |                  |                      |             |
| Modeled as continuous                                                          |                  |                      |             |
| In HIV-/HCV- (N=65)                                                            | 0.01             | -0.01, 0.04          | 0.30        |
| In HIV-/HCV+ (N=63)                                                            | -0.04            | -0.08, 0.01          | 0.11        |
| In HIV+/HCV- (N=64)                                                            | <b>-0.03</b>     | <b>-0.06, -0.001</b> | <b>0.04</b> |
| In HIV+/HCV+ (N=64)                                                            | -0.005           | -0.03, 0.03          | 0.75        |
| <b>Individual inflammatory macrophage markers, per each standard deviation</b> |                  |                      |             |
| <u>Among entire study population (N=256)</u>                                   |                  |                      |             |
| Gal-3BP                                                                        | -0.01            | -0.03, 0.01          | 0.29        |
| sCD163                                                                         | -0.02            | -0.04, 0.01          | 0.15        |
| sCD14                                                                          | 0.004            | -0.02, 0.03          | 0.79        |

cIMT = right distal common carotid artery intima-media thickness, CI = confidence interval, HCV = hepatitis C virus, HIV = human immunodeficiency virus, mm = millimeters.

All analyses adjusted for age, race/ethnicity, smoking status, body mass index, high-sensitivity C-reactive protein, and except for stratified analyses, HIV and HCV infection. Bold indicates significant at p<0.05.

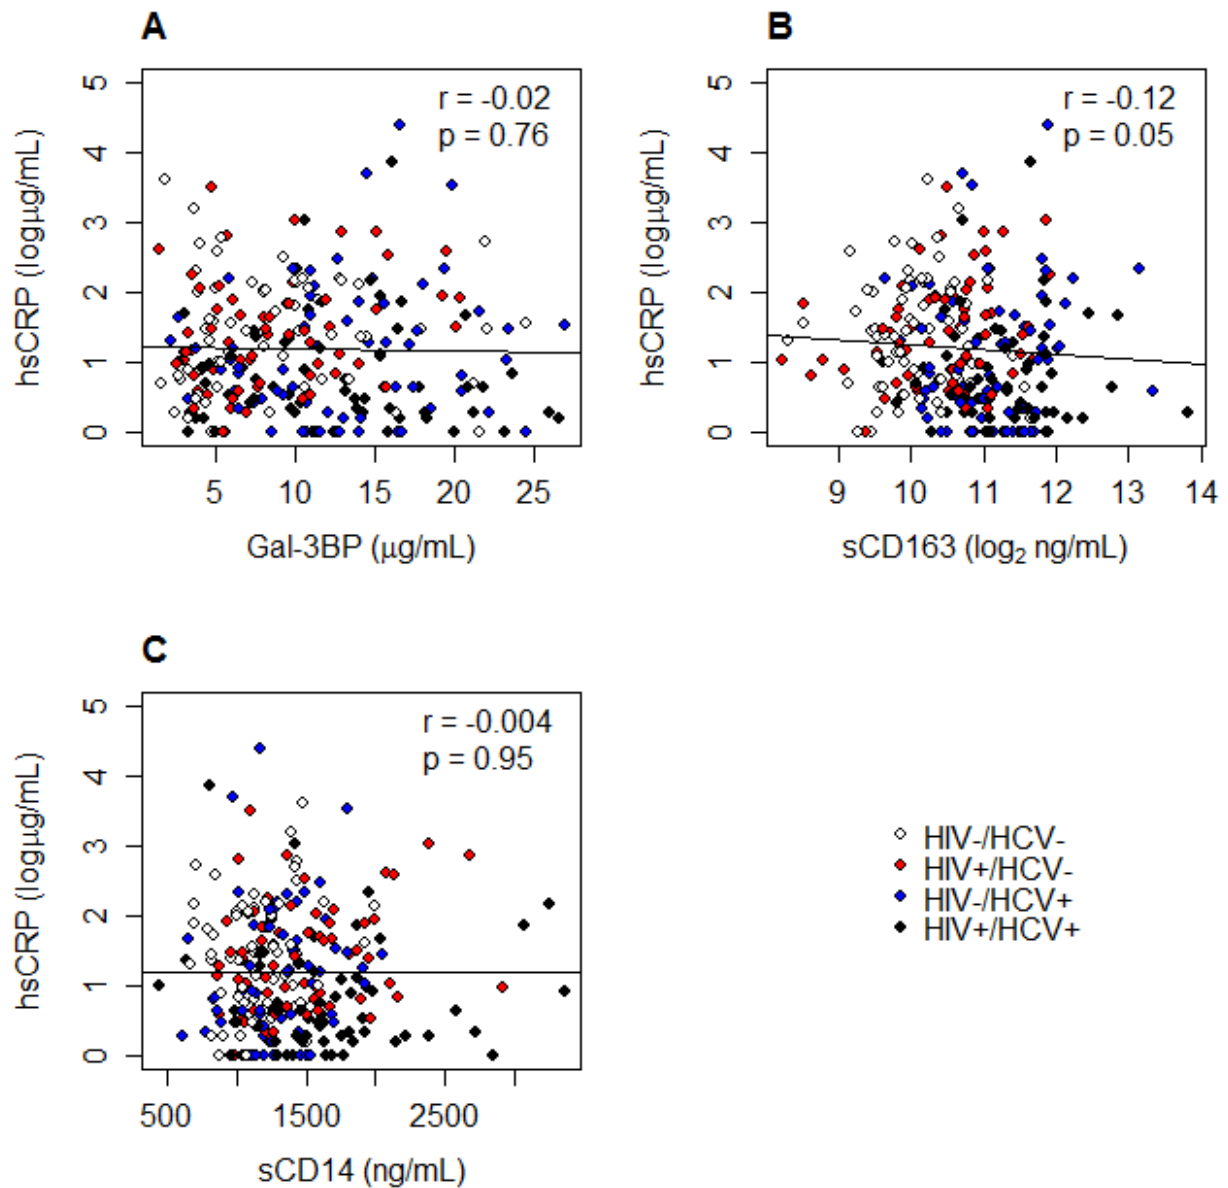

**Supplemental Figure I. Spearman correlation, comparing high sensitivity C-reactive protein (hsCRP) levels to (A) Gal-3BP, (B) sCD163, and (C) sCD14, across four HIV/HCV strata.**

hsCRP log-transformed after adding one to original value. Line represents regression line fit to observed data.

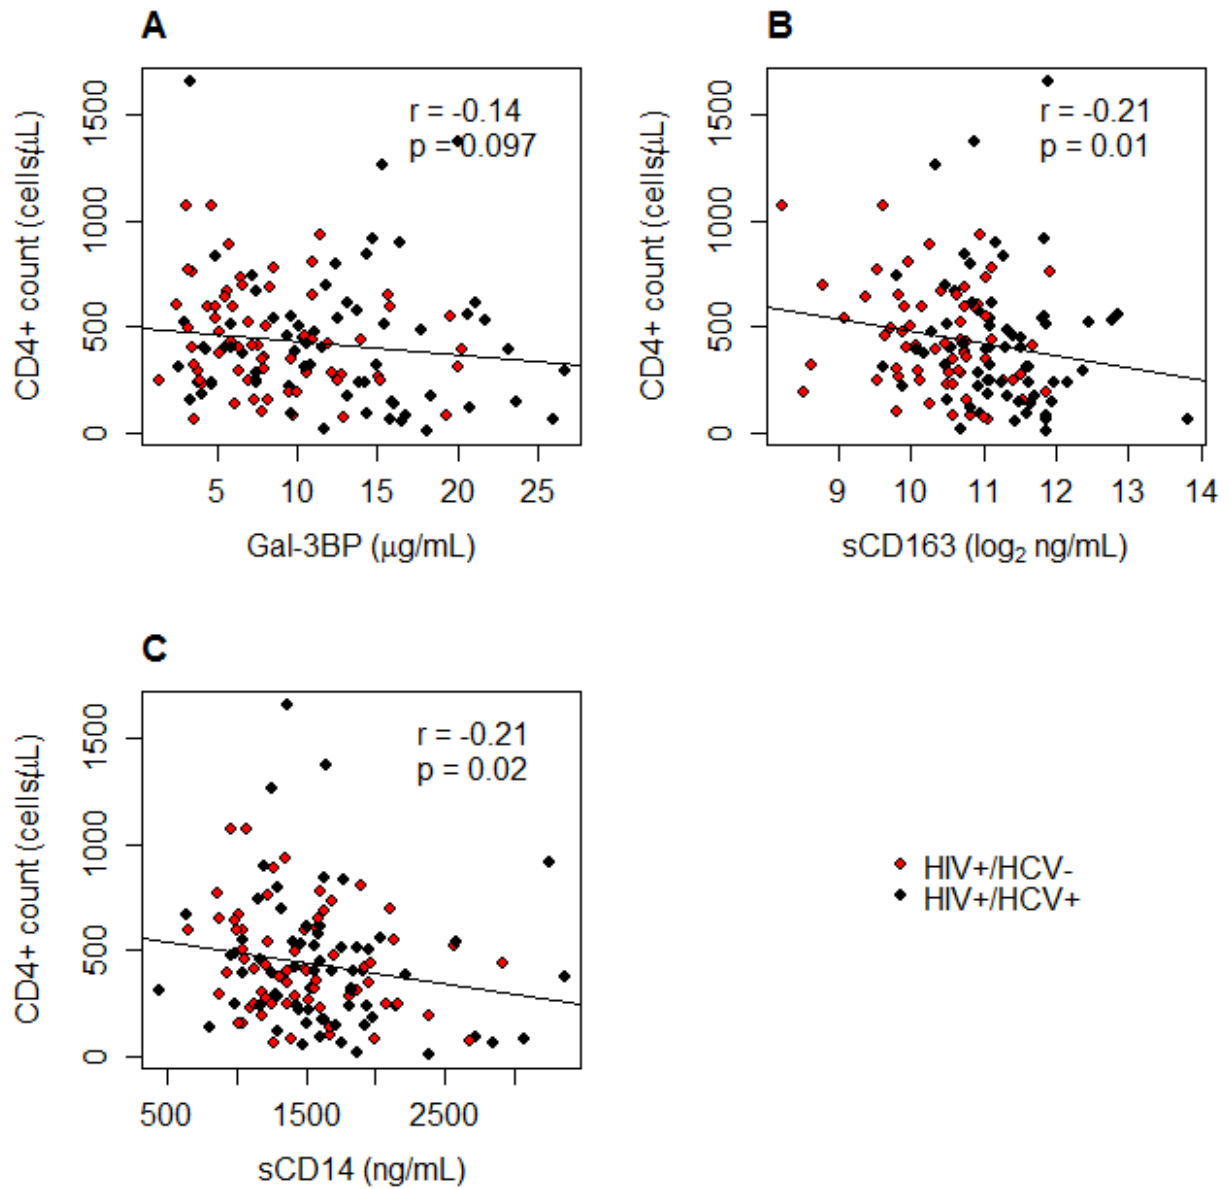

**Supplemental Figure II. Spearman correlation, comparing CD4+ count to (A) Gal-3BP, (B) sCD163, and (C) sCD14, among HIV+ women, stratified by HCV status.**

Line represents regression line fit to observed data.

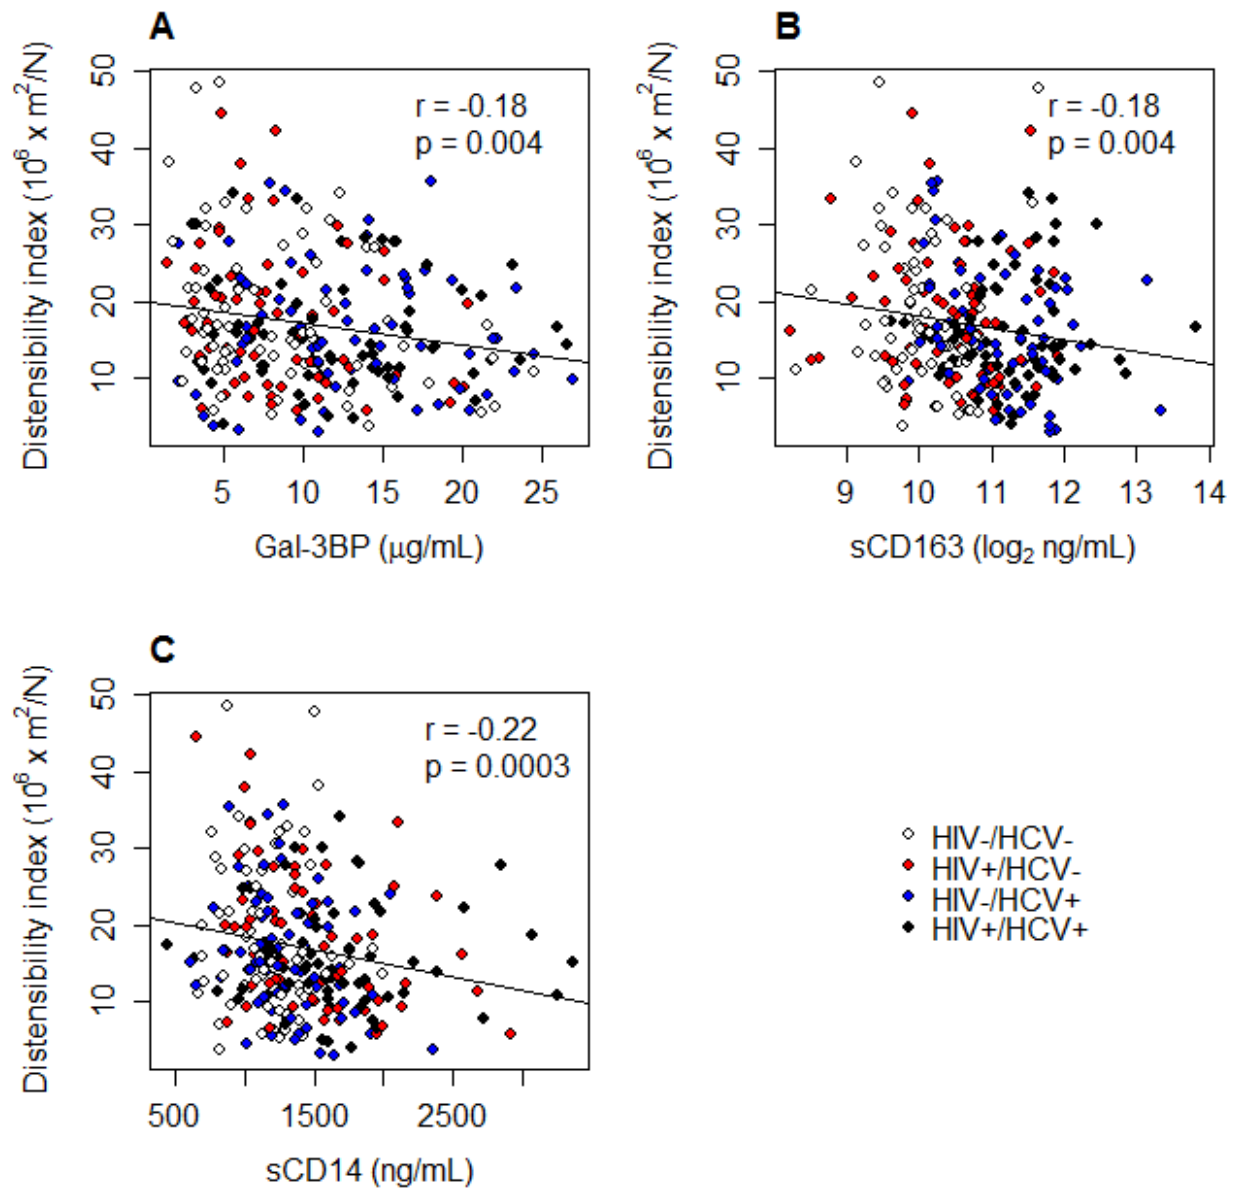

**Supplemental Figure III. Spearman correlations comparing distensibility index with (A) Gal-3BP, (B) sCD14, and (C) sCD163, across four HIV/HCV strata.**

Line represents regression fit to observed data.

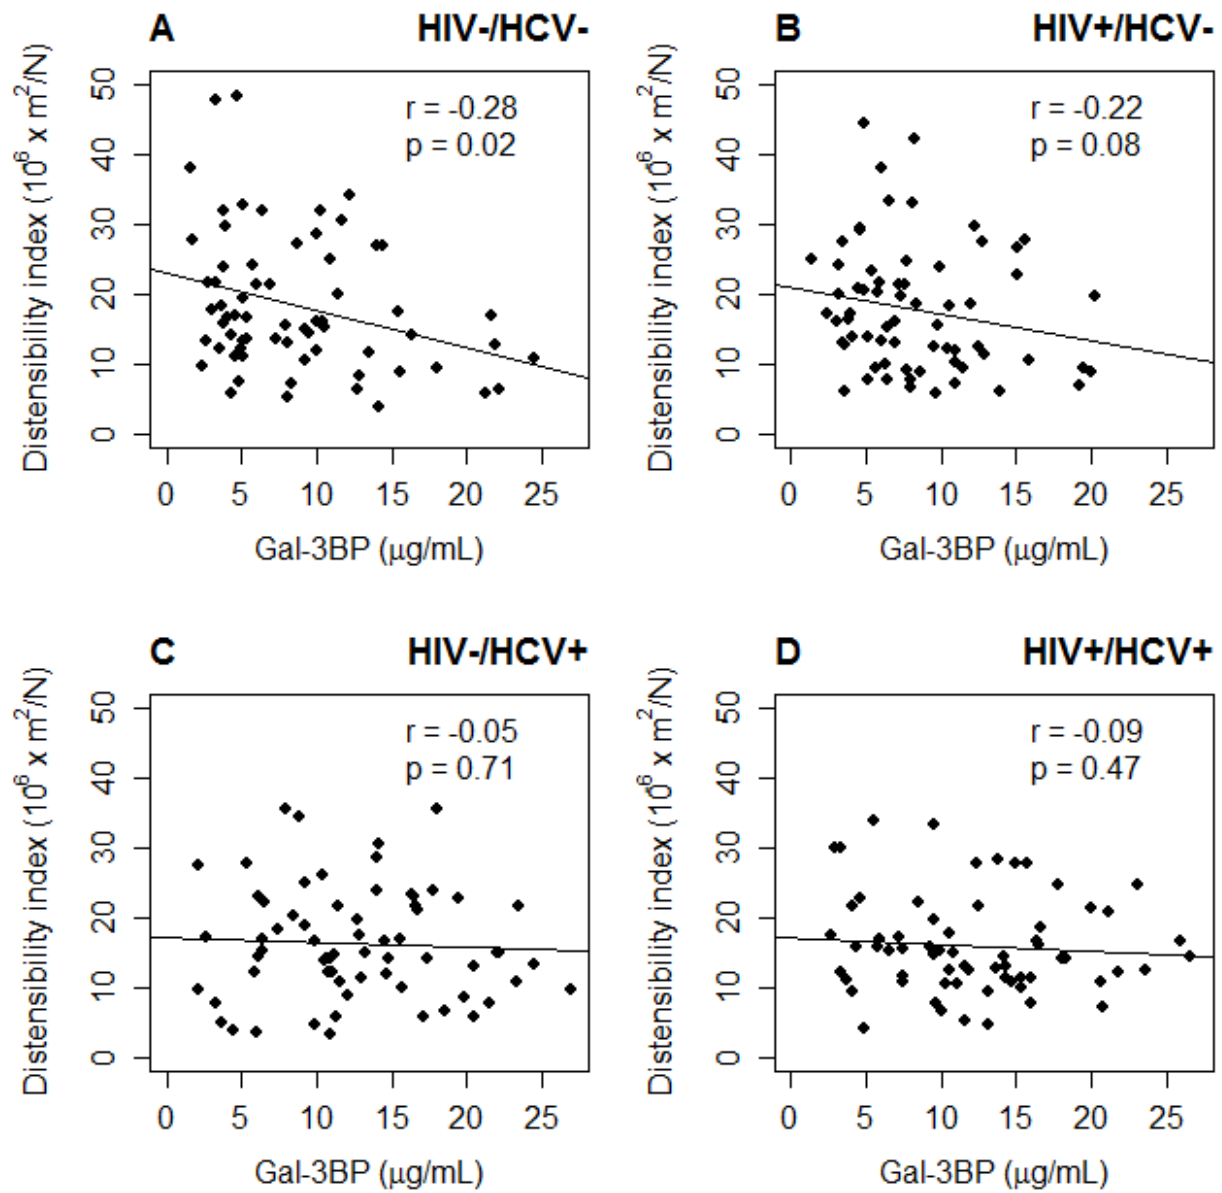

**Supplemental Figure IV. Spearman correlations between Gal-3BP and distensibility index, by HIV/HCV strata.**

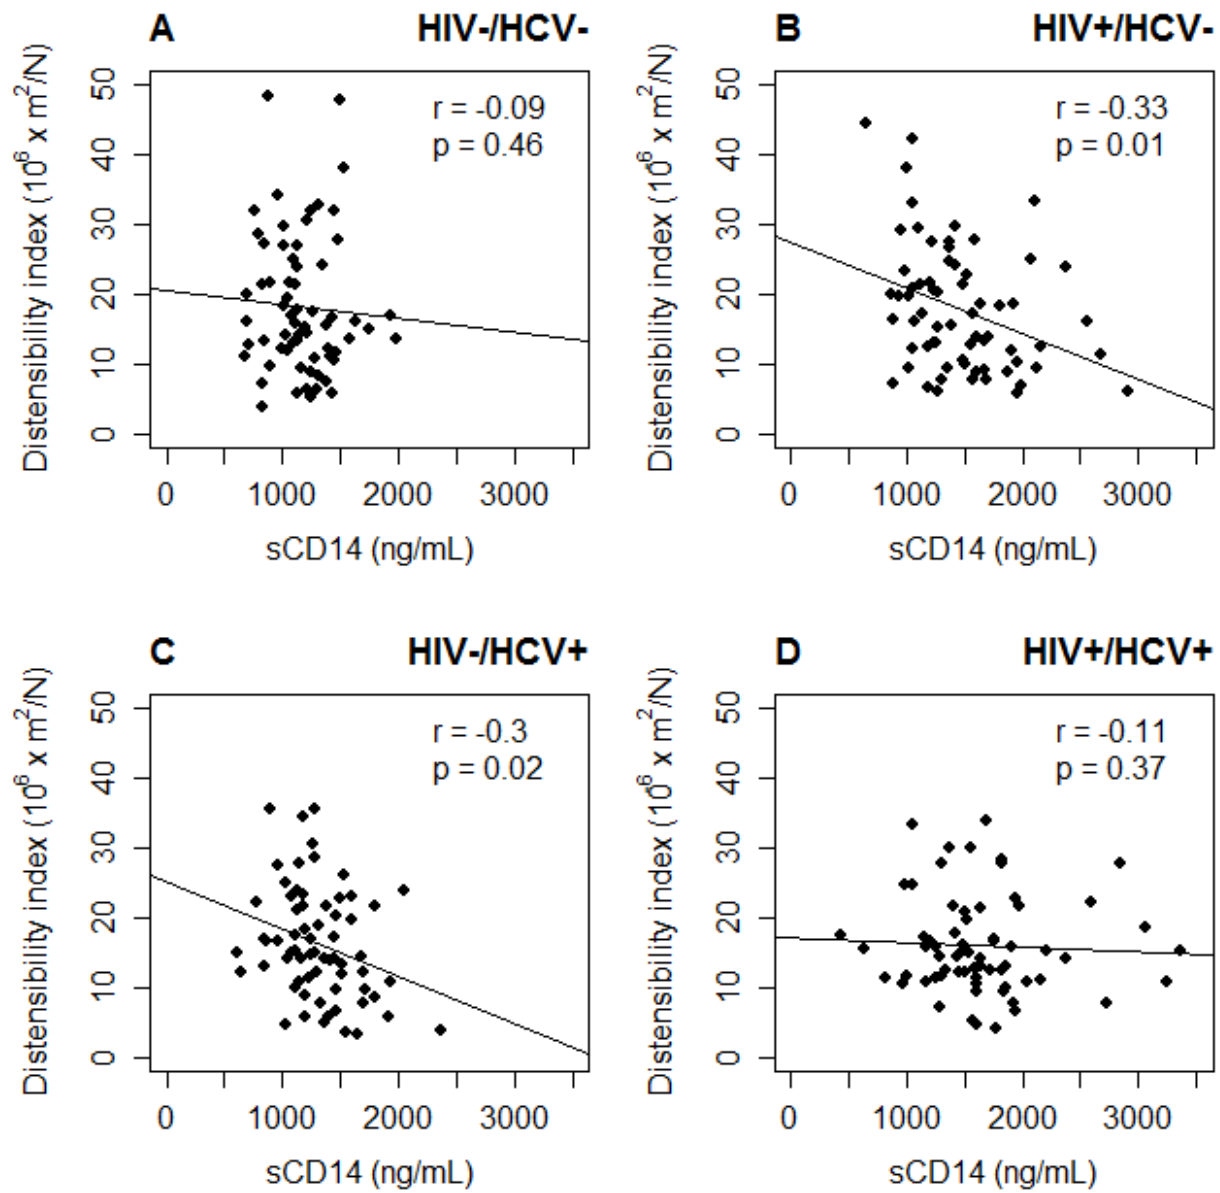

**Supplemental Figure V. Spearman correlations between sCD14 and distensibility index, by HIV/HCV strata.**
